# Supplementary material for: Cognitive Restraint and History of Dieting Are Negatively Associated with Organic Food Consumption in a Large Population-Based Sample of Organic Food Consumers
Source: MDPI journal article supplement (doi:10.3390/nu11102468), 2019-10-15
Supplement: s1 [file s1]

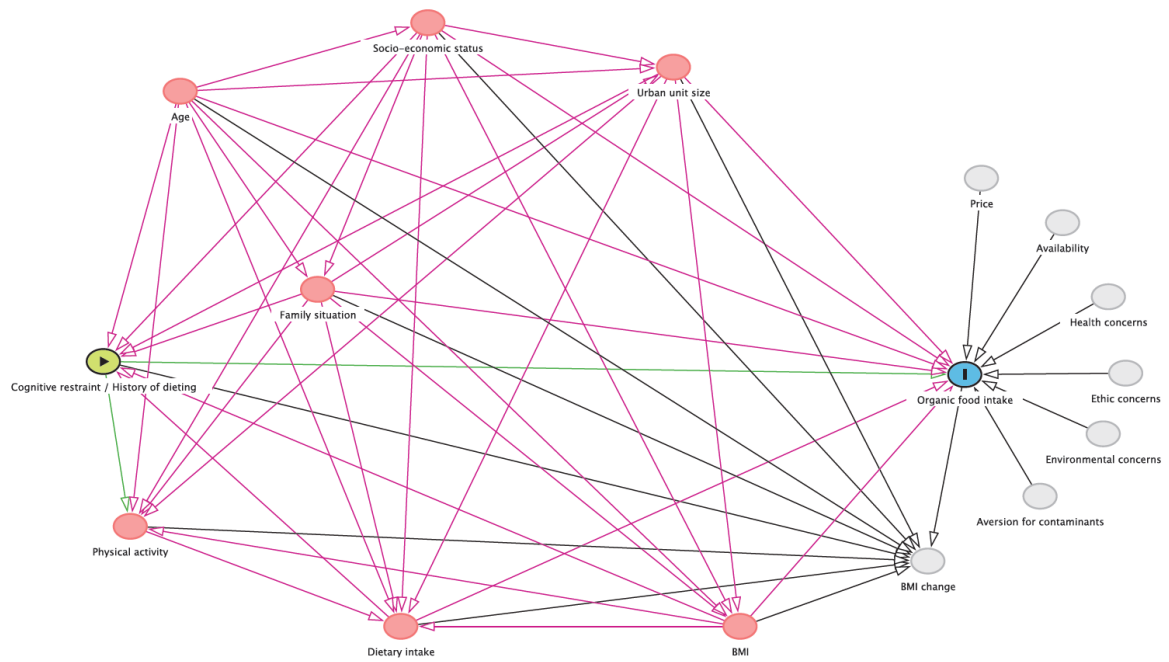

**Figure S1.** Directed acyclic graph (DAG) representing associations between cognitive restrain/history of dieting and organic food consumption. Minimal sufficient adjustment sets for estimating the total effect of cognitive restrain/history of dieting on organic food intake as suggested by the DAG are: age, BMI, dietary intake, family situation, socioeconomic status, urban unit size. Colors of variables: green—exposure; blue—outcome; red—co-variables. (NutriNet-Santé study (2010–2014)).
